# Supplementary material for: Iron(i) complexes of 2,9-bis(2-hydroxyphenyl)-1,10-phenanthroline (H2dophen) as electrocatalysts for carbon dioxide reduction. X-Ray crystal structures of [Fe(dophen)Cl]2·2HCON(CH3)2 and [Fe(dophen)(N-MeIm)2]ClO4 (N-MeIm = 1-methylimidazole)
Source: Royal Society of Chemistry journal article supplement (doi:10.1039/b108472k), 2002-01-01
Supplement: b108472k.doc [file b108472k.doc]

# Supplementary Information

**Iron(I) Complexes of 2,9-Bis(2’-hydroxyphenyl)-1,10-phenanthroline (H2dophen) as Electrocatalysts for Carbon Dioxide Reduction. X-ray Crystal Structures of [Fe(dophen)Cl]2.2HCON(CH3)2 and [Fe(dophen)(N-MeIm)2]ClO4 (N-MeIm = 1-methylimidazole)**

So-Ngan Puna, Wan-Hung Chunga, Kin-Ming Lama, Peng Guoa, Pak-Ho Chana, Kwok-Yin Wonga*, Chi-Ming Cheb*, Tai-Yuen Chenc and Shie-Ming Pengc,

aDepartment of Applied Biology and Chemical Technology, The Hong Kong Polytechnic University, Hunghom, Kowloon, Hong Kong, P.R. China

bDepartment of Chemistry, The University of Hong Kong, Pokfulam Road, Hong Kong, P.R. China

cDepartment of Chemistry, National Taiwan University, Taipei, Taiwan, ROC

*To whom correspondence should be addressed

Fax: (852) 2364 9932

E-mail: [bckywong@polyu.edu.hk](mailto:bckywong@polyu.edu.hk)

Figure S1. (a) A plot of the half-wave potential (E1/2) for the [FeIII(dophen)(N-MeIm)2]+/[FeII(dophen)(N-MeIm)] couple with log[N-MeIm]. (b) A plot of the half-wave potential (E1/2) for the [FeII(dophen)(N-MeIm)]/[FeI(dophen)]- couple with log [N-MeIm].

Figure S2. Normalized time resolved FTIR spectra in the region 3500-1750 cm-1 (8 cm-1 resolution, 100 scans) collected from a glassy working carbon electrode in a DMSO solution of **2** (5 mM) saturated with CO2 and containing 1.23 M CF3CH2OH. E2 = -2.16 V and E1 = -0.46 V vs.Cp2Fe+/0. Supporting electrolyte: 0.1 M TBAH. Consecutive spectra were recorded at 45s intervals

.

Figure S1

Figure S2
